# Supplementary material for: HIF2α in the uterine stroma permits embryo invasion and luminal epithelium detachment
Source: JCI journal article supplement (doi:10.1172/jci98931), 2018-06-17
Supplement: sd1 [file 1]

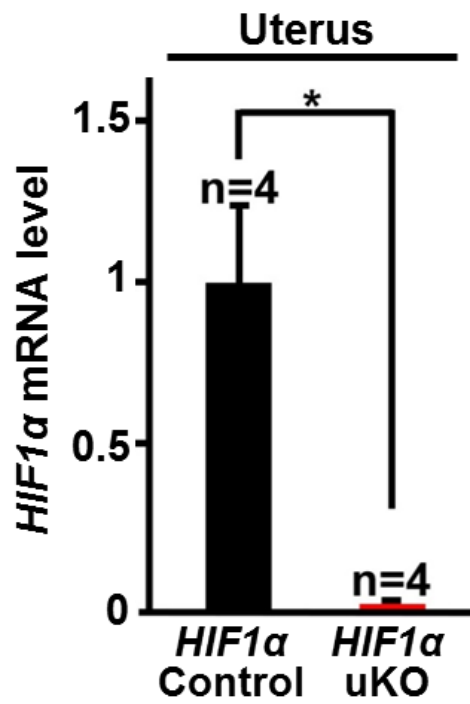

Supplemental Figure 1. *HIF1α* mRNA levels were reduced in the uterine luminal epithelium of *HIF1α* uKO mice. n=4, \* $P < 0.05$ , mean  $\pm$  SEM, Student's *t* test.

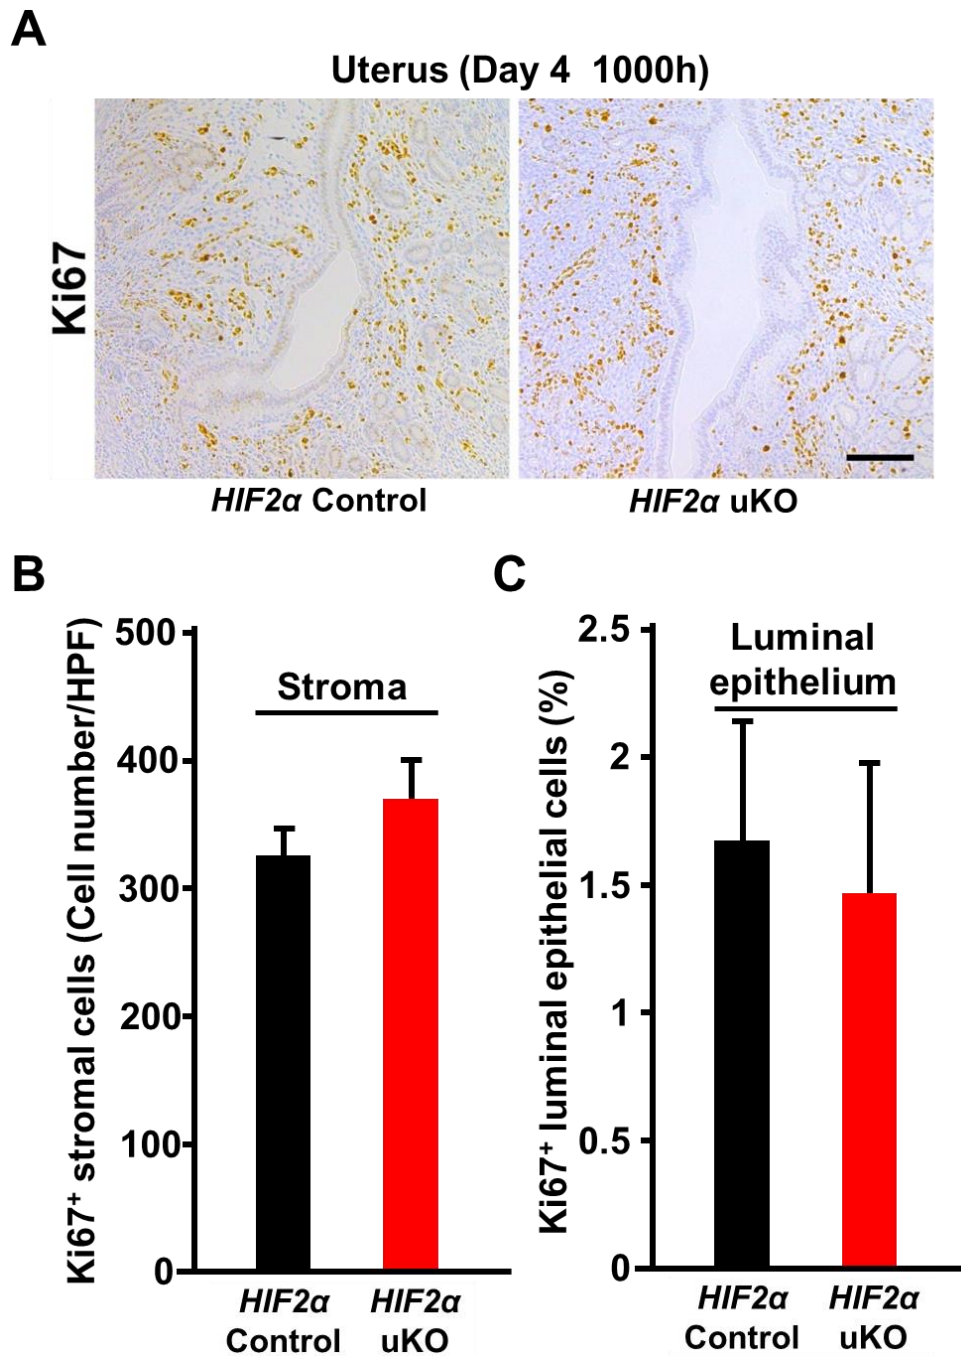

Supplemental Figure 2. Normal proliferation-differentiation switching during implantation, a marker of uterine receptivity, was observed in *HIF2α* uKO uteri on day 4 morning, as evaluated by Ki67 immunostaining. **A**, Scale bar, 200μm. **B&C**, Ki67<sup>+</sup> cell number on 3 randomly selected high-power fields in the uteri obtained from 5 different mice in each group were manually counted. Total number of Ki67<sup>+</sup> stromal cells were demonstrated in **B**. Percentage of Ki67<sup>+</sup> luminal epithelial cells were demonstrated in **C**. ( $P>0.05$ , mean  $\pm$  SEM, Student's *t* test)

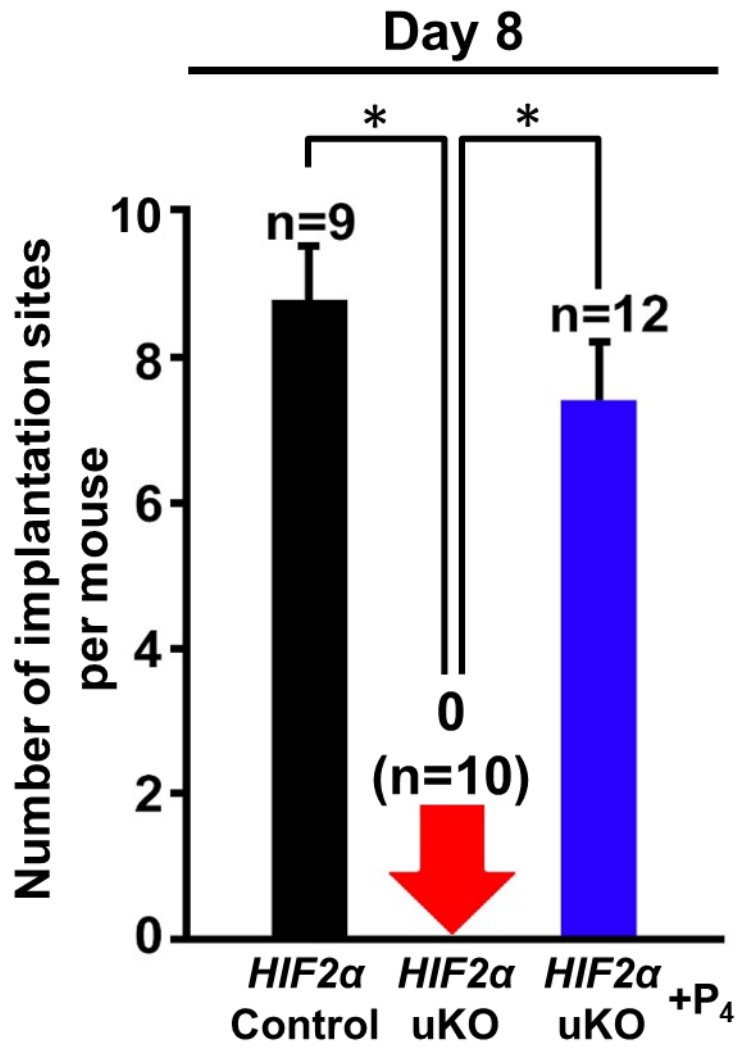

**Supplemental Figure 3. P<sub>4</sub> administration restores number of implantation sites in *HIF2α* uKO mice.** Daily injection of P<sub>4</sub> from day 2 of pregnancy (2mg/mouse/day) restored number of implantation sites in *HIF2α* uKO mice on day 8 of pregnancy. \**P*<0.05, mean ± SEM, Student's *t* test.

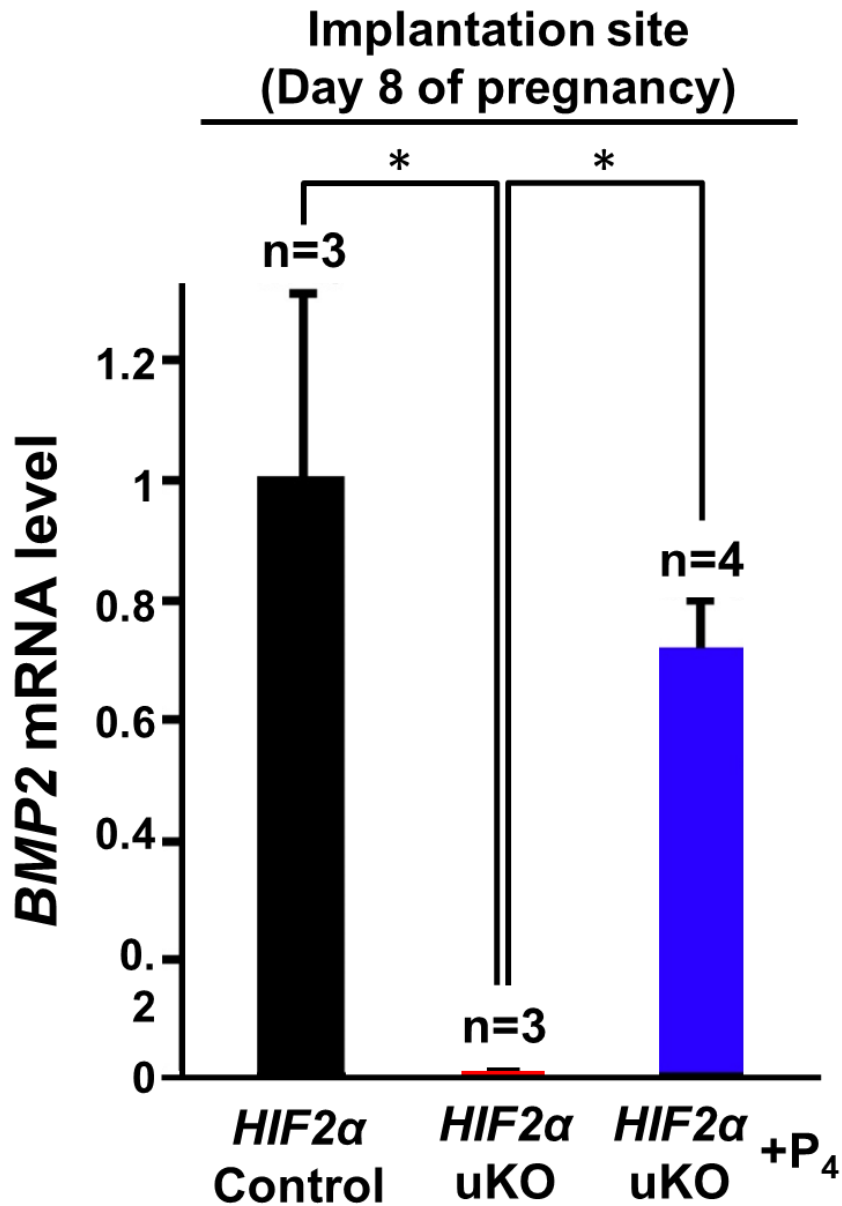

Supplemental Figure 4. Expression of a decidualization marker BMP2 was comparable between *HIF2α* uKO mice with P<sub>4</sub> treatment and control mice on day 8 of pregnancy. n≥3, \*P<0.05, mean ± SEM, Student's *t* test.

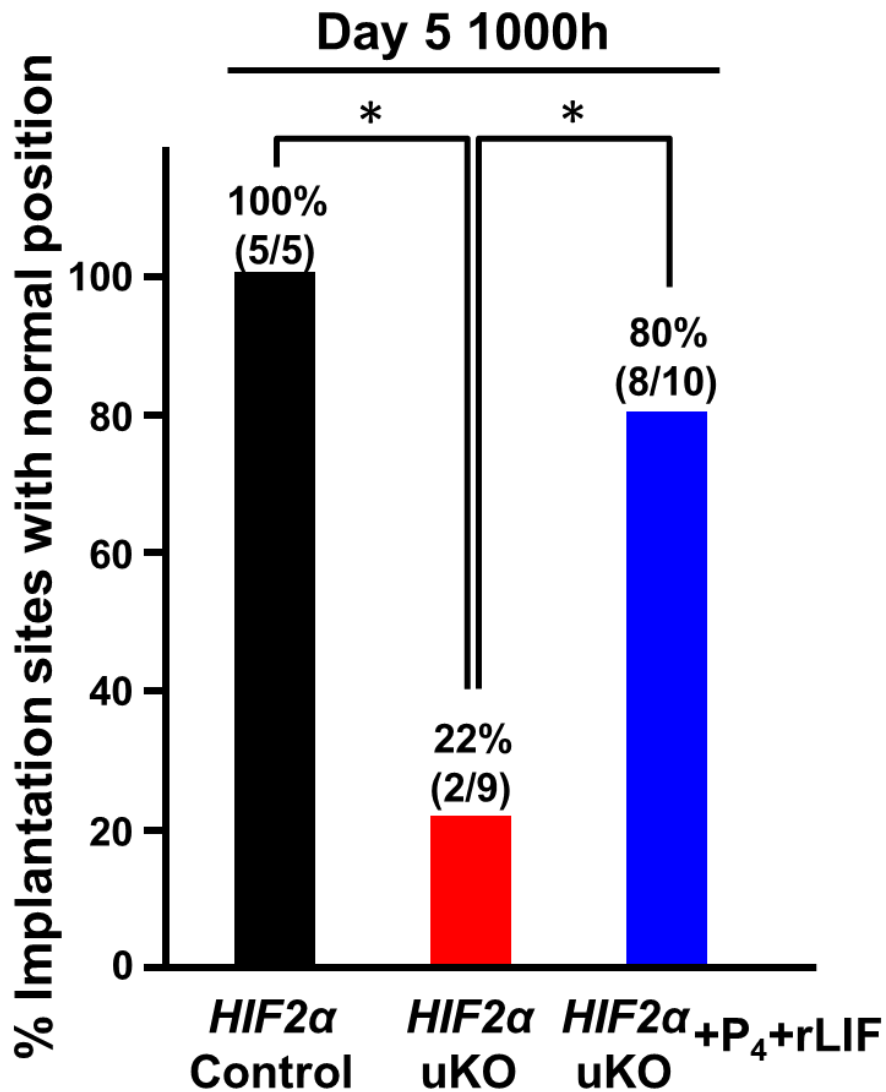

Supplemental Figure 5. Injection of recombinant LIF into *HIF2α* uKO mice in addition to P<sub>4</sub> injection normalizes the position of embryo attachment to the bottom of endometrial crypt on day 5 morning. The position of embryo was evaluated by H&E staining. Percentage of normal position of embryo was calculated. n≥5, \*P<0.05, Fisher's exact probability test.

## Implantation site (Day 5 2000h)

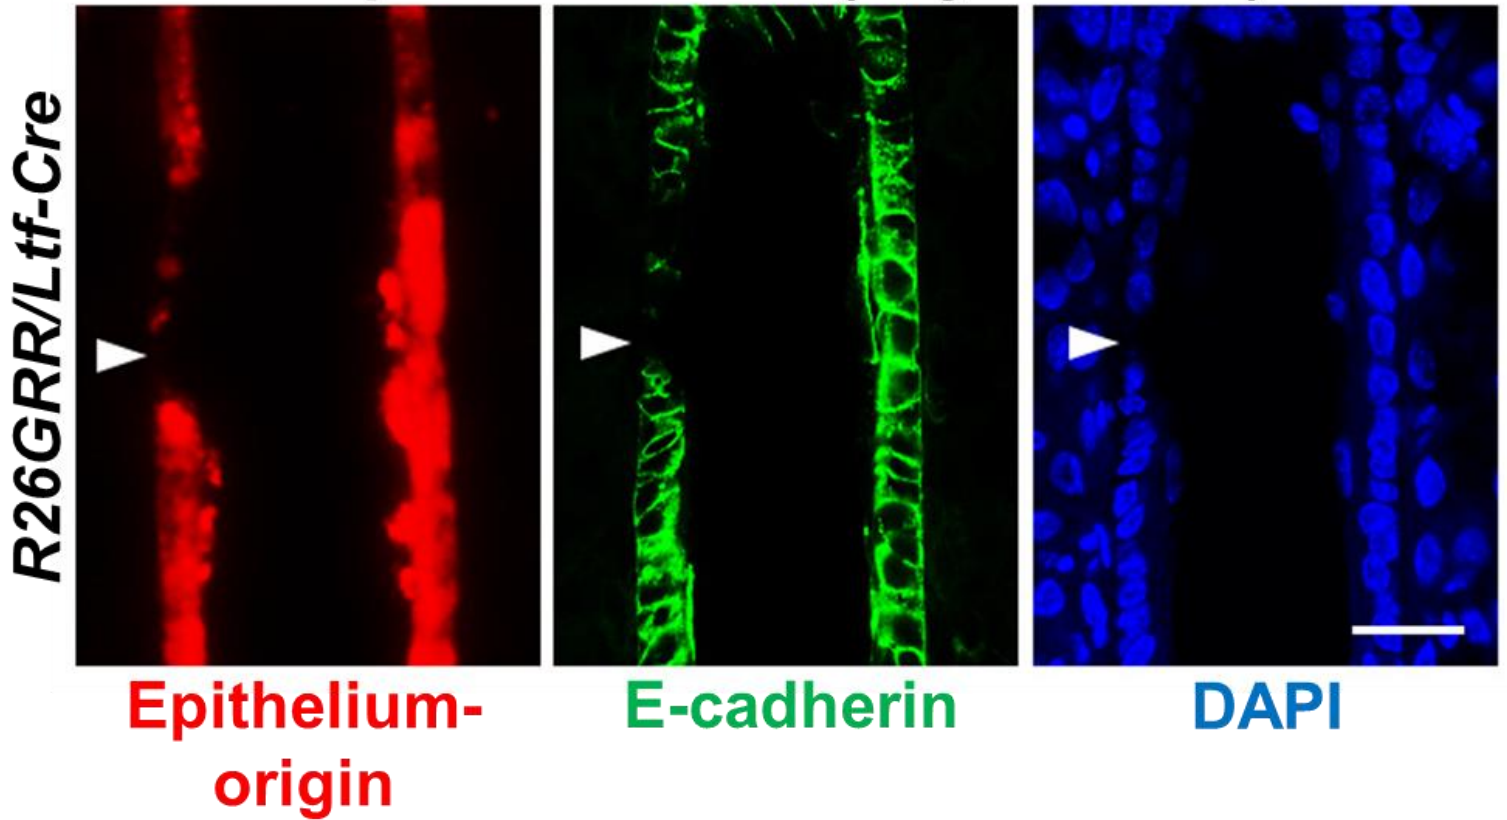

**Supplemental Figure 6. EMT is not involved in vanishment of luminal epithelium around embryo.** EMT at the implantation site was investigated using R26GRR/Ltf-Cre mice which can be used for tracing of the cells with uterine epithelium origin. Epithelium-derived cells were not apparently observed in the uterine stroma surrounding the invading embryo at 2000h on day 5 of pregnancy. Scale bar, 100 $\mu$ m.

## Implantation site (Day 5 1900h)

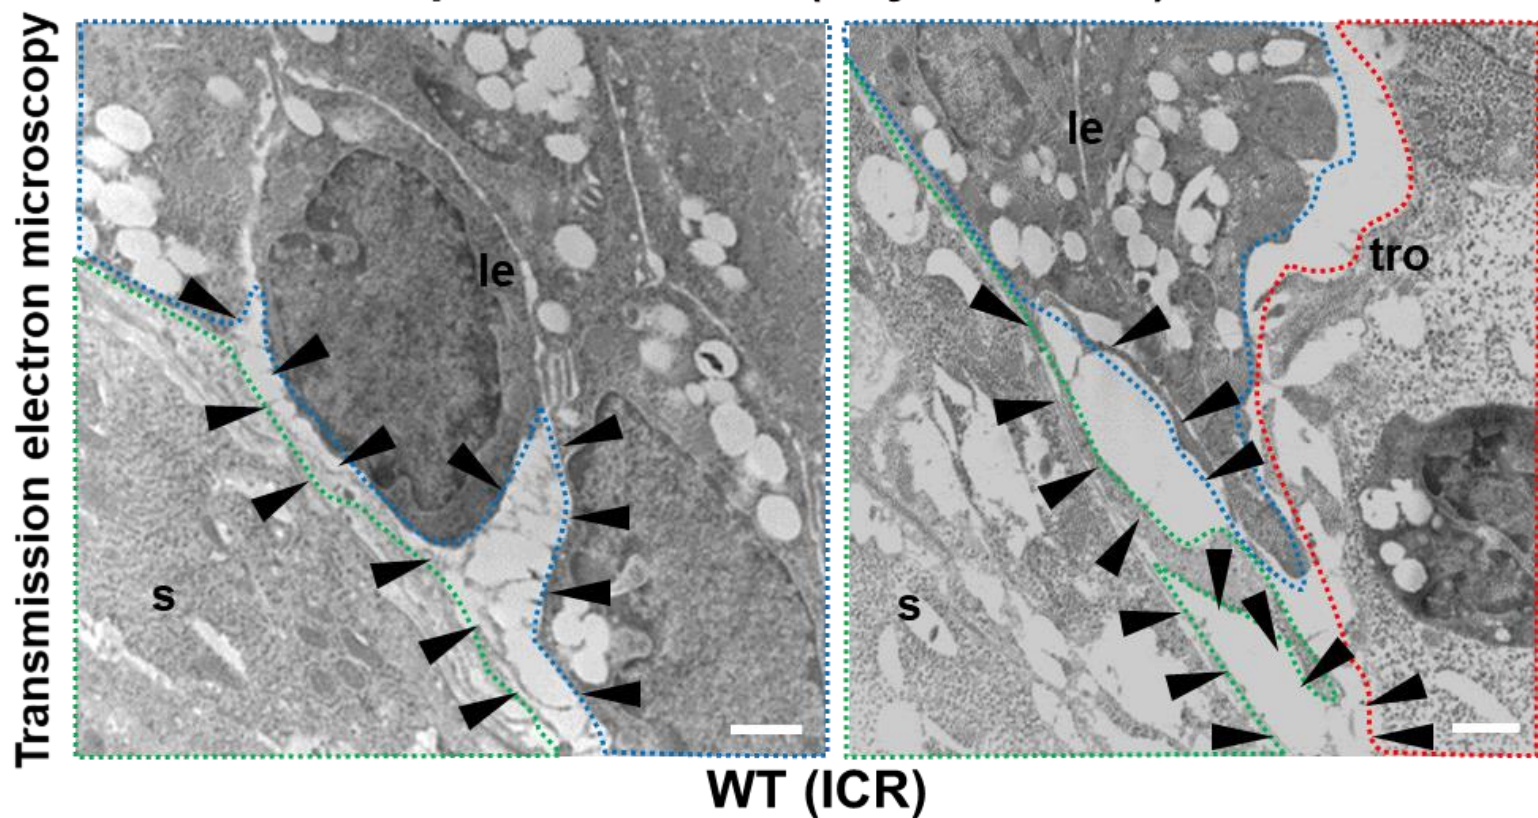

**Supplemental Figure 7. Detachment of luminal epithelium from stroma occurs in WT mice on ICR background.** Transmission electron microscopic analyses of embryo-uterine interface at 1900h on day 5 demonstrated the newly-formed gaps between the stroma and the luminal epithelium (arrowhead) and the invading trophoblast into these gaps in WT mice on ICR background. Scale bar, 1 $\mu$ m; s, stroma; tro, trophoblast; le, luminal epithelium.







**Implantation site  
(Day 5 1700h)**

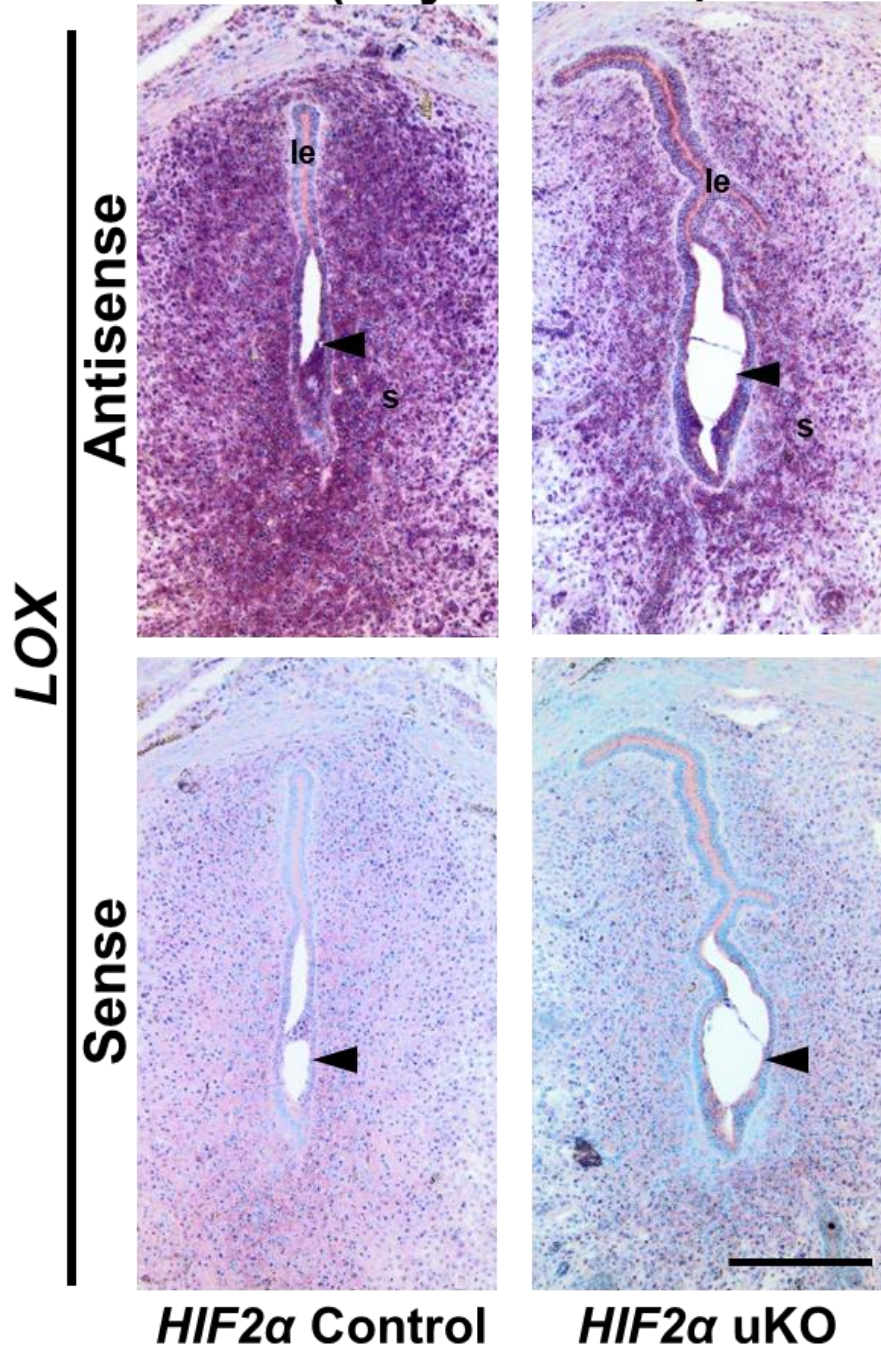

**Supplemental Figure 9. LOX expression is downregulated in *HIF2α* uKO uterus on day 5 evening. Scale bar, 200µm; arrowhead, an embryo; le, luminal epithelium; s, stroma.**

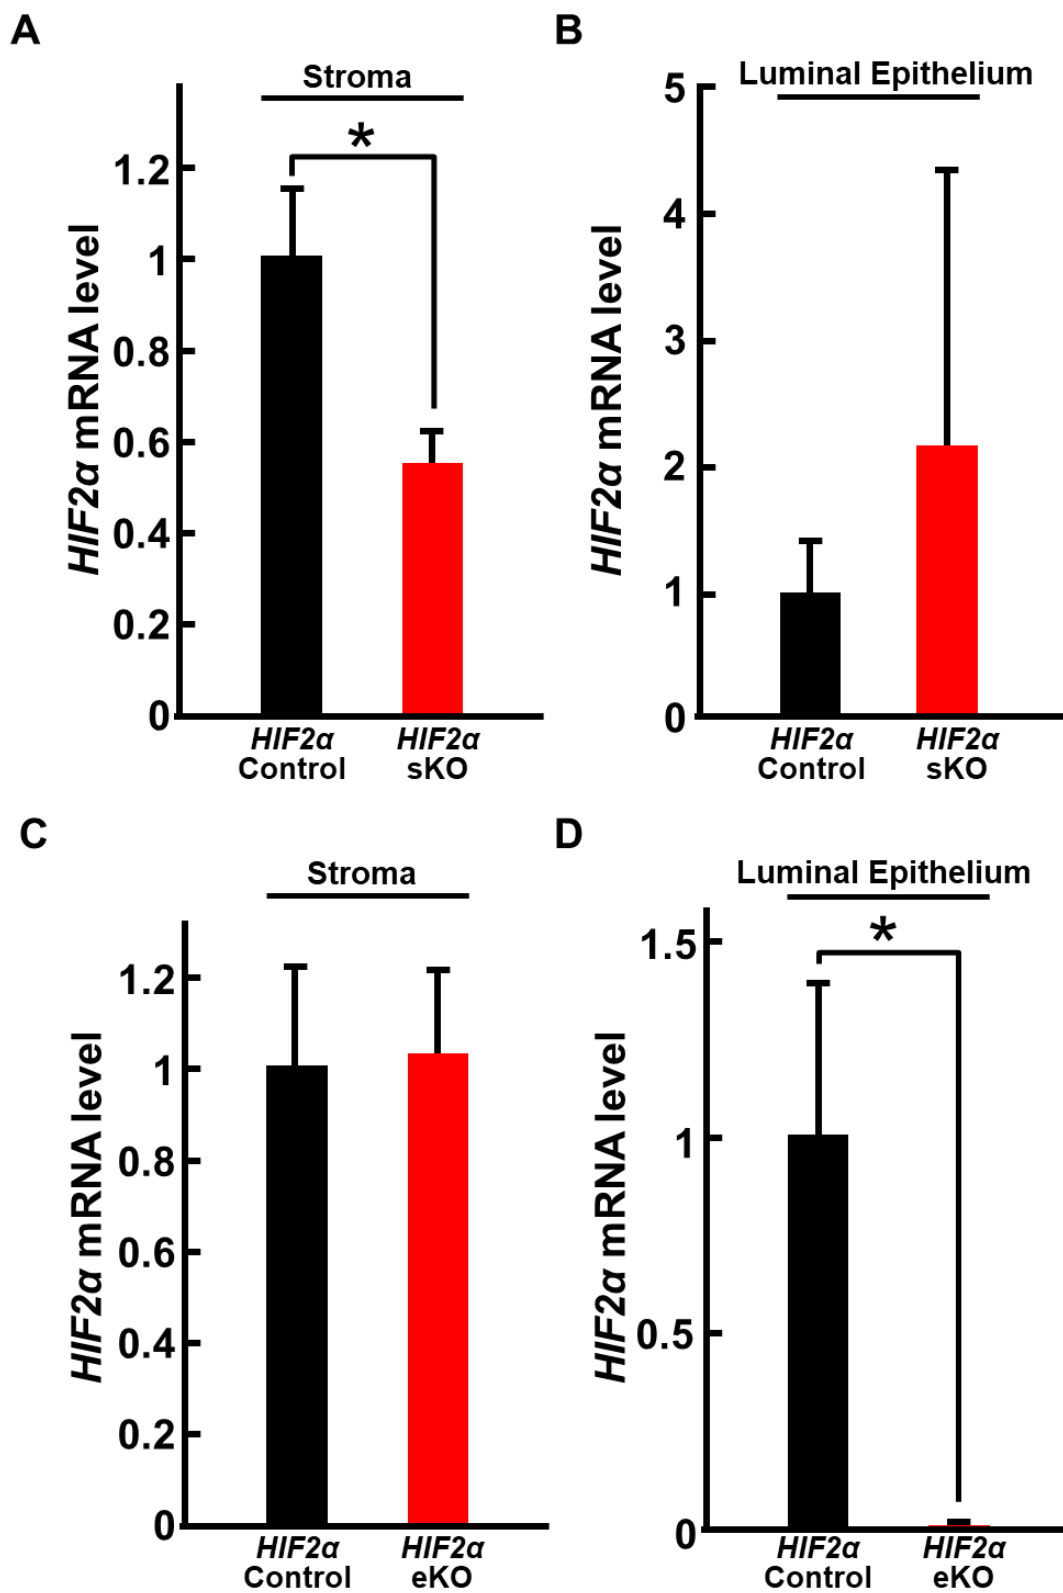

Supplemental Figure 10. *HIF2α* sKO and eKO mice show effective downregulation of *HIF2α* mRNA in uterine stroma and luminal epithelium, respectively. Stroma and luminal epithelium were collected by laser capture microdissection. *HIF2α* mRNA levels were reduced in the uterine stroma and luminal epithelium of *HIF2α* sKO and eKO mice, respectively.  $n \geq 3$ ,  $*P < 0.05$ , mean  $\pm$  SEM, Student's *t* test.

## Implantation site (Day 5 2000h)

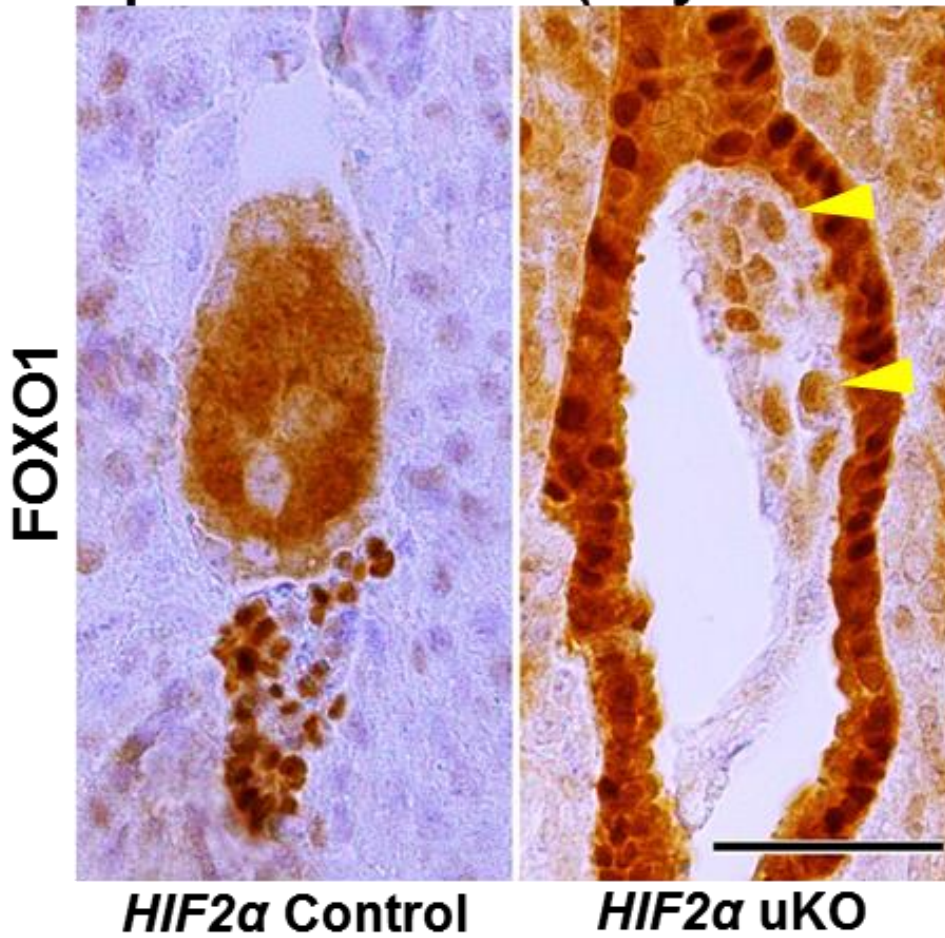

Supplemental Figure 11. Nuclear accumulation of FOXO1 was observed in the embryo of *HIF2α* uKO mice, while its cytosol staining was observed in those of control mice during embryo invasion (day 5, 2000h). Scale bar, 200 $\mu$ m; arrowhead, nuclear staining of FOXO1 in the embryo attached to the uterus of *HIF2α* uKO mice.

**Supplemental Table 1. Primer sequences for qPCR.**

| <b>Gene</b>                     | <b>Strand</b> | <b>Sequence</b>          |
|---------------------------------|---------------|--------------------------|
| mouse<br><i>Hif1a</i>           | Forward       | TCGGCGAAGCAAAGAGTCTG     |
|                                 | Reverse       | CACTGTCTAGACCACCGGC      |
| mouse<br><i>Hif2a (Epas1)</i>   | Forward       | TGAGGAAGGAGAAATCCCGTG    |
|                                 | Reverse       | GGCAACTCATGAGCCAACTC     |
| mouse<br><i>Prl3c1</i>          | Forward       | ACCTTTCCTGAGCTGGAGGC     |
|                                 | Reverse       | GAACAGACCCTTCCAGGTGC     |
| mouse<br><i>Prlr</i>            | Forward       | TTCTTCTCAGAGACACGCGG     |
|                                 | Reverse       | GCGTTCTTTAGTTCTGCTGGA    |
| mouse<br><i>Cox2 (Ptgs2)</i>    | Forward       | AGAACCGCATTGCCTCTGAA     |
|                                 | Reverse       | AGAAGCGTTTGCGGTACTCA     |
| mouse<br><i>Lif</i>             | Forward       | GCTATGTGCGCCTAACATGA     |
|                                 | Reverse       | AGTGGGGTTCAGGACCTTCT     |
| mouse<br><i>Vegf (Vegfa)</i>    | Forward       | CGATTGAGACCCTGGTGGAC     |
|                                 | Reverse       | GCTGGCTTTGGTGAGGTTTG     |
| mouse<br><i>Adm</i>             | Forward       | CATCCAGCAGCTACCCTACG     |
|                                 | Reverse       | TTCGCTCTGATTGCTGGCTT     |
| mouse<br><i>Lox</i>             | Forward       | TTACACTAACAACGGCCGTGAAGA |
|                                 | Reverse       | CTAGACCACGGTCCCCTGAAGA   |
| mouse<br><i>Mt2-mmp (Mmp15)</i> | Forward       | CTTGTACGCTCAGACCCAAGCA   |
|                                 | Reverse       | TTCCTGGACTCCATCCCAAAG    |
| mouse<br><i>Bmp2</i>            | Forward       | TGGAAAAGGACATCCGCTCC     |
|                                 | Reverse       | TGCCACGATCCAGTCATTCC     |
| mouse<br><i>Actb</i>            | Forward       | TGTTACCAACTGGGACGACA     |
|                                 | Reverse       | GGGGTGTTGAAGGTCTCAA      |
